# Supplementary material for: Altered (neo-) lacto series glycolipid biosynthesis impairs α2-6 sialylation on N-glycoproteins in ovarian cancer cells
Source: PubMed Central journal article supplement (PMC5371825; doi:10.1038/srep45367), 2017-03-30
Supplement: srep45367-s1.pdf [file srep45367-s1.pdf]

# **Altered (neo-) lacto series glycolipid biosynthesis impairs $\alpha$ 2-6 sialylation on *N*-glycoproteins in ovarian cancer cells**

Shahidul Alam<sup>1,2+</sup>, Merrina Anugraham<sup>1+</sup>, Yen-Lin Huang<sup>1</sup>, Reto S. Kohler<sup>1</sup>, Timm Hettich<sup>3</sup>, Katharina Winkelbach<sup>1</sup>, Yasmin Grether<sup>1</sup>, Mónica Núñez López<sup>1</sup>, Nailia Khasbiullina<sup>4</sup>, Nicolai V. Bovin<sup>4</sup>, Götz Schlotterbeck<sup>3</sup>, Francis Jacob<sup>1,2\*</sup>

**Supplementary information**

**Supplemental Fig. S1**

**Single- cell selection after transient transfection of CRISPR- *Cas9* encoding plasmids.** Representative gating of fluorescence activated single cell sorting into 96-well plates after transient delivery of pSpCas9(BB)-2A-GFP (PX458) encoding sgRNA.

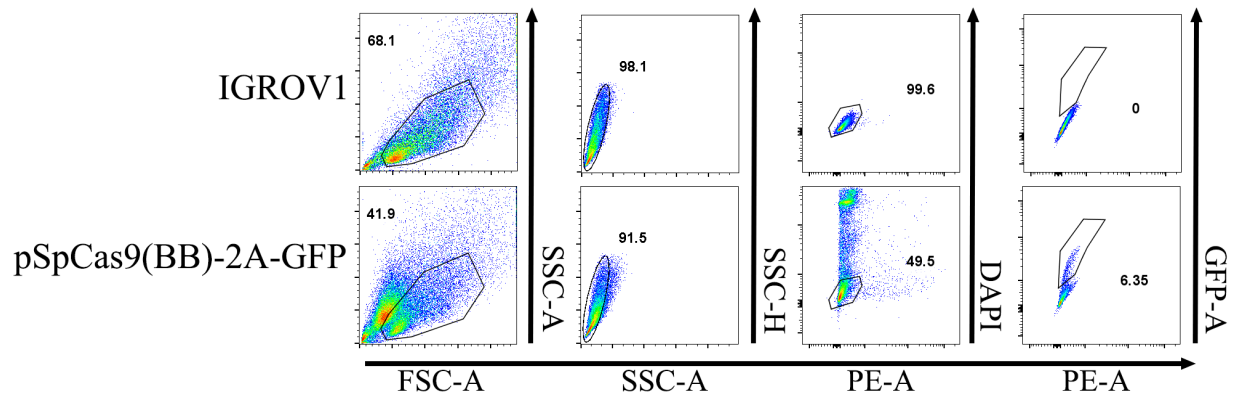

## Supplemental Fig. S2

**Determination and verification of potential off targets.** *In silico* analysis revealed 50 and 17 potential off-targets for sgRNA\_1 and sgRNA\_2, respectively. The sgRNA\_1 had only one predicted off-target in gene NM\_001242377 chr5:+112339780 whereas sgRNA\_2 was not predicted for an off-target site in a gene. Genomic sequences of predicted off-targets with highest score for each sgRNA were further amplified and sequenced, in which no mutations were observed. Off target DNA sequencing results for B3GNT5 wildtype (IGROV1) and knockout (clone KO\_1 and KO\_2) cells performed in triplicates. Genomic DNA sequence according to February 2009 human reference sequence (<http://genome.ucsc.edu/index.html>, GRCh37). Standard SP6 DNA Sequencing primer was used.

|            |                                                     |    |            |
|------------|-----------------------------------------------------|----|------------|
| Off target | 5'- ata cac aat tac agt ctt ttc aga aat tta gat -3' |    | GENOME     |
| 01_SP6_    | 5'- ata cac aat tac agt ctt ttc aga aat tta gat -3' | OK | clone KO_1 |
| 02_SP6_    | 5'- ata cac aat tac agt ctt ttc aga aat tta gat -3' | OK | clone KO_1 |
| 03_SP6_    | 5'- ata cac aat tac agt ctt ttc aga aat tta gat -3' | OK | clone KO_1 |
| 04_SP6_    | 5'- ata cac aat tac agt ctt ttc aga aat tta gat -3' | OK | clone KO_2 |
| 05_SP6_    | 5'- ata cac aat tac agt ctt ttc aga aat tta gat -3' | OK | clone KO_2 |
| 06_SP6_    | 5'- ata cac aat tac agt ctt ttc aga aat tta gat -3' | OK | clone KO_2 |
| 07_SP6_    | 5'- ata cac aat tac agt ctt ttc aga aat tta gat -3' | OK | IGROV1     |
| 08_SP6_    | 5'- ata cac aat tac agt ctt ttc aga aat tta gat -3' | OK | IGROV1     |
| 09_SP6_    | 5'- ata cac aat tac agt ctt ttc aga aat tta gat -3' | OK | IGROV1     |

### Supplemental Fig. S3

**Determination of anti- P<sub>1</sub> IgM binding epitopes using printed glycan array.** Barchart demonstrating the binding specificity for human anti-P<sub>1</sub> IgM P3NIL100 antibodies. We performed a broad screening of glycan binding specificity of the monoclonal antibody P3NIL100 across 381 glycans by utilizing glycan array technology. The results clearly demonstrated that antibody bound specifically to glycans with Gal $\alpha$ 1-4Gal $\beta$ 1-4GlcNAc $\beta$  as well as glycans terminating with Gal $\alpha$ 1-3(Gal $\alpha$ 1-4)Gal $\beta$ 1-4 and GalNAc $\alpha$ 1-4Gal $\beta$ 1-4, with some of these structures bearing  $\alpha$ 1-2-linked fucose. As expected, there was no binding of the antibody to Gb3 glycan (Gal $\alpha$ 1-4Gal $\beta$ 1-4Glc $\beta$ -sp).

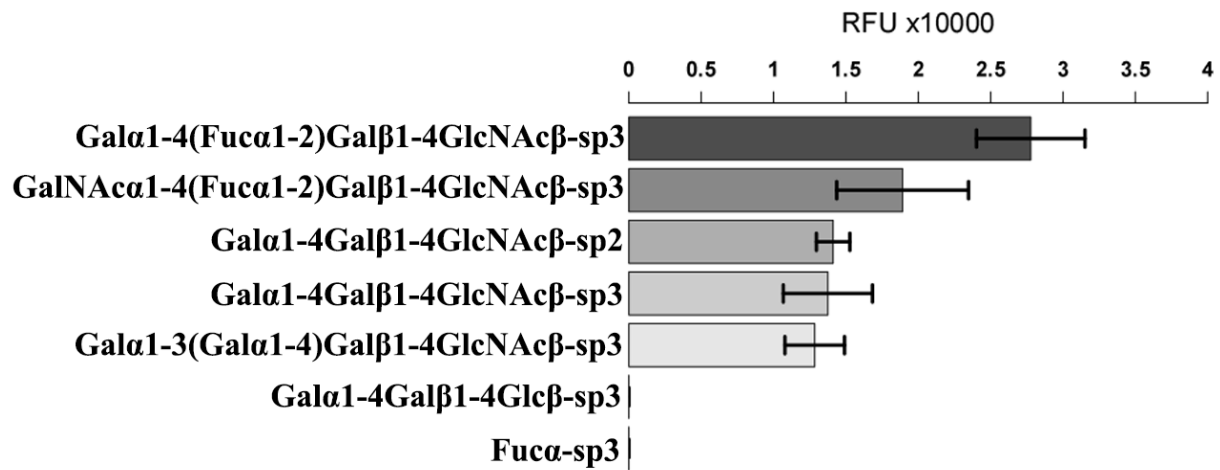

### Supplemental Fig. S4

**The epitope for anti- nLc4 IgM is present on glycoproteins in colon cancer cell line Ls174T. A)** Histogram showing the absence of  $\alpha$ 2-6 sialylation in Ls174T cells. **B)** Proteinase K treatment on Ls174T cells following staining for CD44 and nLc4. Representative histogram for unstained (white), Proteinase K - untreated (dark gray) and -treated cells (light gray). Data are represented as mean  $\pm$  s.d, \*\*\*  $p < 0.001$ , \*\*  $p < 0.01$ .

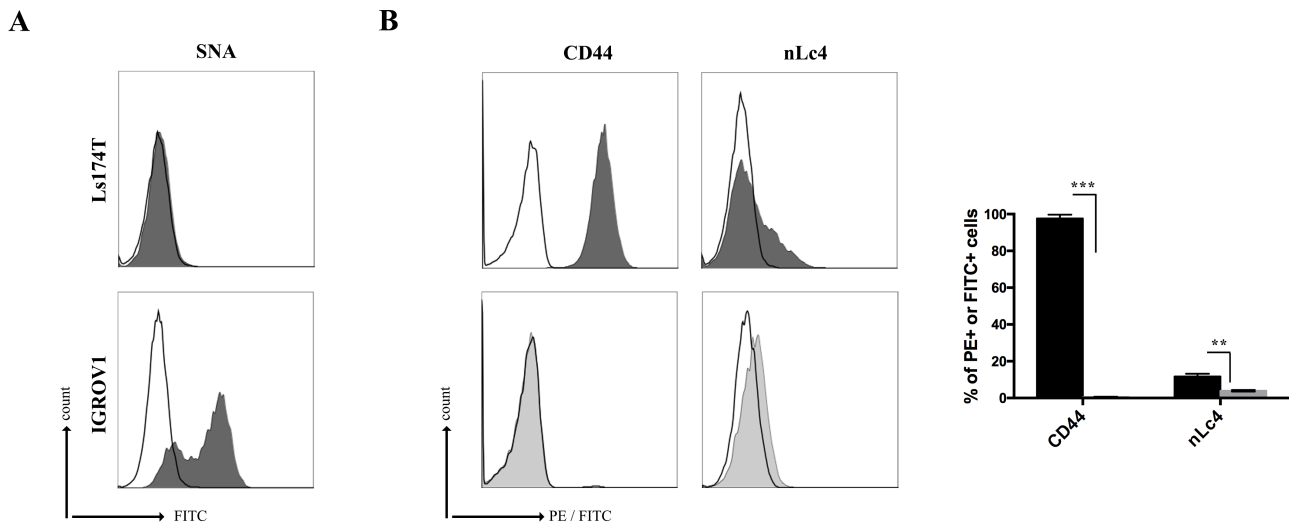

**Supplemental Fig. S5**

**Quantitative gene expression of *ST6GAL1*, *B4GALNT1*, and *B3GNT5* in IGROV1,  $\Delta B3GNT5$ -, and  $\Delta B4GALNT1$ - cells.** Barchart represents three independent experiments. Data are represented as mean  $\pm$  s.d. RT-qPCR was performed in triplicates on three independent experiments.

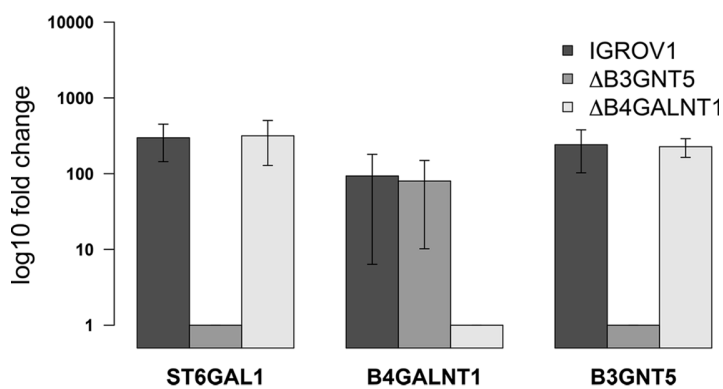

## Supplemental Table S1

Oligonucleotides used in the study.

| <b>single guided RNAs</b>    |                                   |                                   |                                 |              |        |
|------------------------------|-----------------------------------|-----------------------------------|---------------------------------|--------------|--------|
|                              | oligonulceotide 5'-3'             |                                   | Gene                            | Method       |        |
| sgRNA 1                      | CAC CGA TAC ACG ATT ATA GCC GTT T | AAA CAA ACG GCT ATA ATC GTG TAT C | B3GNT5                          | Gene-editing |        |
| sgRNA 2                      | CAC CGA TCG ACG TTC CGG AAT TAG A | AAA CTC TAA TTC CGG AAC GTC GAT C | B3GNT5                          | Gene-editing |        |
| sgRNA 1                      | CAC CGT GGA TGC CGC GGT TTC GAC G | AAA CCG TCG AAA CCG CGG CAT CCA C | B4GALNT1                        | Gene-editing |        |
| sgRNA 2                      | CAA CGC CTT CAA ATA GTC CTC GGG A | AAA CTC CCG AGG ACT ATT TGA AGG C | B4GALNT1                        | Gene-editing |        |
| <b>genotyping PCR primer</b> |                                   |                                   |                                 |              |        |
|                              | oligonulceotide 5'-3' (Forward)   |                                   | oligonulceotide 5'-3' (Reverse) | Gene         | Method |
| PCR_1                        | GTA TCT GCT TTC ATC CTG ACC AT    | TGC CCA ACT GAA CTG CAT AAG       | B3GNT5                          | Genotyping   |        |
| PCR_2                        | GTA TCT GCT TTC ATC CTG ACC AT    | TCG AGA CCA TAG AAC TTC GTG T     | B3GNT5                          | Genotyping   |        |
| PCR_3                        | GGC CTC GCT ACC AAT ACT T         | TGC CCA ACT GAA CTG CAT AAG       | B3GNT5                          | Genotyping   |        |
| PCR_4                        | GAT GAG GAT AAA GCA GTG CAG AT    | GCC TCA GCC CTG CTT CAA ATC       | chr5:113003768+113004235        | off target   |        |
| PCR_1                        | AGA GCG TTA GAC AGG TCA GT        | TGG AGG AAG GAG AGG ACA GA        | B4GALNT1                        | Genotyping   |        |
| PCR_2                        | CTG TGC GCT CTG GTC CTT           | TGG AGG AAG GAG AGG ACA GA        | B4GALNT1                        | Genotyping   |        |
| PCR_3                        | CCA CTA CTT GCT CCT TGA TCC       | TGG AGG AAG GAG AGG ACA GA        | B4GALNT1                        | Genotyping   |        |
| PCR_4                        | CCA CTA CTT GCT CCT TGA TCC       | CTG TGC GCT CTG GTC CTT           | B4GALNT1                        | Genotyping   |        |
| PCR_5                        | GCA CAT ACT GAA GCG TTC ACA       | ATC CCA GCT CCT CAG CTA CA        | chr22:30296425-30296628         | off target   |        |
| PCR_6                        | TTG GCC AGA GGT TCA TGC TA        | ACC GTC ACC CTA CTC AAG TG        | chr12:52518025-52518321         | off target   |        |

## Supplemental Table S2

Details of target and reference genes, primers and amplicons investigated in this study by RT-qPCR. QPCR parameters are provided including efficiency (E in %; calculated based on the standard curve according to the equation  $E=10^{(-1/\text{slope})}-1$ ) x 100 and expressed as percentage) and correlation coefficient ( $R^2$ ).

| Symbol            | Gene name                                                              | Accession number | Chr. location | Forward Primer 5'-3'          | Reverse Primer 5'-3'         | Amplicon size in bp | E in % | R <sup>2</sup> |
|-------------------|------------------------------------------------------------------------|------------------|---------------|-------------------------------|------------------------------|---------------------|--------|----------------|
| <i>B3GNT5</i>     | UDP-GlcNAc $\beta$ -1,3- <i>N</i> -acetylglucosaminyl-transferase 5    | NM_032047.4      | 3q28          | GGCTTGAACCTTCGT<br>GAGTTTCGC  | TCGAGACCATAGAA<br>CTTCGTGT   | 305                 | 92.2   | 0.994          |
| <i>ST6GALNAC1</i> | GalNAc $\alpha$ -2,6-Sialyltransferase I                               | NM_018414.3      | 17q25.1       | CGAAATAGGAGGCC<br>TTCAGACGAC  | TTTCTGGAGCCACA<br>GCGACTTG   | 76                  | 74.1   | 0.999          |
| <i>ST6GALNAC2</i> | GalNAc $\alpha$ -2,6-Sialyltransferase II                              | NM_006456.2      | 1q31.1        | ATCGAATTCCTGGGA<br>CAGGAAAGGG | GATTGAACAGGCCA<br>CGGAAAGTG  | 92                  | 83.9   | 0.899          |
| <i>ST6GALNAC3</i> | GalNAc $\alpha$ -2,6-Sialyltransferase III                             | NM_001160011.1   | 1q31.1        | AGCGCATGAGTTAC<br>TGTGATGG    | TGCATGGTCACTCT<br>GTACTGTCC  | 69                  | 103.9  | 0.999          |
| <i>ST6GALNAC4</i> | GalNAc $\alpha$ -2,6-Sialyltransferase IV                              | NM_175039.3      | 9q34.11       | ACCAGATCTCCAG<br>GACGAGAC     | TCTTCTCCCTGCAGT<br>AGCTGTC   | 150                 | 86.7   | 0.998          |
| <i>ST6GALNAC5</i> | GalNAc $\alpha$ -2,6-Sialyltransferase V                               | NM_030965.1      | 1q31.1        | TGACAATGGCACTG<br>GAGCTCTG    | GTGATTGGGATCCC<br>TGCAGAAG   | 80                  | 131.6  | 0.955          |
| <i>ST6GALNAC6</i> | GalNAc $\alpha$ -2,6-Sialyltransferase VI                              | NM_013443.3      | 9q34.11       | CATGCGGCAATTG<br>ACGACCTC     | CACGAATGAGACTT<br>CTCCCTGTCC | 66                  | 106.1  | 0.999          |
| <i>ST6GAL1</i>    | $\beta$ -galactosamide $\alpha$ -2,6-sialyltransferase 1               | NM_173217.2      | 3q27-q28b     | CCATCTCTGGGAT<br>GCTTGGTATC   | ACGTCAGTCTTGGC<br>CTTGGATG   | 95                  | 98.1   | 0.997          |
| <i>ST6GAL2</i>    | $\beta$ -galactosamide $\alpha$ -2,6-sialyltransferase 2               | NM_001142351.1   | 2q12.3        | TTCTTGGGCGAGG<br>AAATAGATTC   | TCATAACCACGTGT<br>AGGAGCAGAG | 72                  | 99.2   | 0.991          |
| <i>B4GALNT1</i>   | $\beta$ -1,4- <i>N</i> -Acetyl-Galactosaminyl Transferase 1            | NM_001276468     | 12q13.3       | TGTGCGCTCTGGTCC<br>TTCTG      | TTGATCCTGACCGG<br>GATGTGT    | 181                 | 74.1   | 0.999          |
| <i>HSPCB</i>      | Heat shock protein 90kDa alpha (cytosolic)                             | NM_007355        | 6p12          | TCTGGGTATCGGAA<br>AGCAAGCC    | GTGCACTTCCTCAG<br>GCATCTTG   | 80                  | 87.2   | 0.999          |
| <i>YWHAZ</i>      | Tyrosine 3-monooxygenase/tryptophan 5-monooxygenase activation protein | NM_003406        | 8q23.1        | ACTTTTGGTACATTG<br>TGGCTTCAA  | CCGCCAGGACAAAC<br>CAGTAT     | 94                  | 94.1   | 0.999          |
| <i>SDHA</i>       | Succinate dehydrogenase complex, subunit A                             | NM_004168        | 5p15          | TGGGAACAAGAGGG<br>CATCTG      | CCACCACTGCATCA<br>AATTCATG   | 86                  | 100.9  | 0.999          |
